# Supplementary material
Source: Springer Nature journal article supplement (https://www.springermedizin.de/resource/supplementary/13033_2008_30_MOESM2_ESM.pdf/9651728)
Supplement: MOESM2 [file 9651728]

178 women admitted in the MSF program:

- > 15 years old
- 1<sup>st</sup> consultation between 01/2002 and 04/2003
- Unknown assailants wearing uniforms
- Living in Brazzaville

19 refused  
psychological care

159 women had initial  
psychological evaluation

108 women not found because of:

- 41 non complete initial address
- 57 changed address
- 8 didn't come to the appointment
- 2 deaths

70 women found for the long-term impact

6 women not evaluated because of a very severe  
psychological state: referred to therapeutic consultation

64 women were evaluated on initial and long-term  
psychological state:

- TSQ
- EUMP
- Specific socio-familial questionnaire

8 women had  $\leq 1$  GFA evaluation at initial care

56 women were evaluated on the evolution of  
global functioning

- GFA
